# Supplementary material for: Differences in the composition and predicted functions of the intestinal microbiome of obese and normal weight adult dogs
Source: PeerJ. 2022 Feb 16;10:e12695. doi: 10.7717/peerj.12695 (PMC8857902; doi:10.7717/peerj.12695)
Supplement: Supplemental Information 3 — Relative abundance at the genus-level in all animals in this study. [file peerj-10-12695-s003.xlsx]

## Sheet: genus_Percentages
genus	N1	N2	N3	N4	N5	N6	N7	N8	N9	N10	O1	O2	O3	O4	O5	O6	O7	O8	O9	O10
parabacteroides	0.0496626	0.0178425	0.0714189	0.466846	0.0900431	0.198528	0.0701385	0.124819	0.145019	0.0896203	0.193437	0.189013	0.03074	0.0506487	0.0522187	0.0645398	0.0988099	0	0.0234643	0.0545866
acetivibrio	0.00513751	0.00148688	0	0.0841854	0.0117447	0.00372241	0.00818283	0	0.00671384	0.0186224	0	0.00216015	0.00400957	0.000974013	0.00444415	0.00126549	0.00442432	0	0.00335205	0.00129968
symbiobacterium	0	0	0	0.00459193	0	0	0	0	0	0	0	0.00108008	0	0	0	0	0	0	0.00167602	0
gemmobacter	0	0	0	0	0	0	0	0	0	0	0	0	0	0	0	0	0	0	0	0
vallitalea	0.0017125	0	0	0.0229597	0.00260994	0	0.00233795	0	0	0	0	0.00216015	0	0.000974013	0.00111104	0	0	0.00185429	0.00335205	0.00259936
victivallis	0	0	0	0.0107145	0	0	0	0	0	0	0	0	0	0	0.00111104	0	0	0	0	0
anaerobacterium	0	0	0.00113363	0	0.00130497	0	0	0	0	0	0	0	0	0.000974013	0	0.00126549	0.00147477	0	0	0
enterococcus	0.0017125	0	0	0.00306129	0.00260994	0	0.0140277	0.0037075	0.00671384	0.0011639	0	0.00216015	0.00133652	0.000974013	0.0155545	0.00126549	0	0.00185429	0	0
coprococcus	0.0119875	0.0133819	0.0385435	0.0581645	0.0352342	0.0223344	0.0771524	0.0395467	0.0335692	0.046556	0.0424203	0.0680448	0.0253939	0.0370125	0.0199987	0.0202478	0.0383441	0.01298	0.0335205	0.0467885
escherichia	0.0205501	0.0193294	0.213123	0.0244903	0.0378442	0.0384649	0.0210416	0.0259525	0.0228271	0.0325892	0.0509044	0.331584	0.0788549	0.0146102	0.0555519	0.0366991	0.00294955	22.6724	0.0301684	0.0311923
pelobacter	0	0	0	0	0	0	0	0	0	0	0	0	0	0	0	0	0	0	0	0
eggerthella	0	0	0	0.0107145	0	0	0.00116898	0	0	0	0	0	0	0	0	0	0	0	0	0
porphyromonas	0.010275	0.00892127	0.0113363	2.72914	0.25186	0.0235752	0.0198726	0.0185375	0.0147705	0.0197863	0.0118777	0.014041	0.00935566	0.0136362	0.0133324	0.0139204	0.0162225	0.00556287	0.0167602	0.0103974
janthinobacterium	0	0	0	0	0	0	0	0	0	0	0	0	0	0	0	0	0	0	0	0
dielma	0.00856252	0.0104081	0.0034009	0.0260209	0.0117447	0.00744482	0.0046759	0.0111225	0.0134277	0.0314253	0.00678725	0.00108008	0.00133652	0.00292204	0.00222207	0.00506195	0.00442432	0	0	0.00259936
marvinbryantia	0.0017125	0	0.00113363	0.0719402	0.0130497	0	0.00350693	0.00123583	0.00134277	0.0023278	0.00509044	0	0.00400957	0.000974013	0.00111104	0.00126549	0	0	0.0067041	0.00259936
intestinibacter	0	0.00297376	0.0147372	0	0.0143547	0.00744482	0.0093518	0.00741501	0.0147705	0.0023278	0.027149	0.0205215	0.03074	0.00876612	0.0333311	0.0164513	0.0103234	0.0352315	0.00335205	0.0129968
peptococcus	0.633627	0.0267638	0.306081	0.319904	0.4724	0.282903	0.74113	0.0234809	0.341063	0.37012	1.15892	0.909425	0.326112	0.306814	1.91987	0.334088	0.831773	0.0482115	0.0385486	0.289829
peptostreptococcus	0	0	0	0.0107145	0.00391492	0	0.00116898	0	0	0.0023278	0.00169681	0.00108008	0	0	0.0088883	0	0.00147477	0.00185429	0	0.00129968
homo	0	0	0	0	0	0	0	0	0	0	0	0	0	0	0	0	0	0	0	0
flavobacterium	0	0	0	0	0	0	0	0	0	0	0	0	0	0	0	0	0	0	0	0
ruminococcus	1.53954	2.84142	1.93624	8.23792	2.23411	2.15527	3.64019	1.62389	2.61168	3.31828	3.9417	3.51781	2.03552	3.35353	3.30311	2.90049	4.41252	0.318938	6.20129	4.92189
fluviicola	0	0	0	0	0	0	0	0	0	0	0	0	0	0	0	0	0	0	0	0
anaerofilum	0.0239751	0.0996208	0.089557	0.0183677	0.101788	0.00620401	0.142615	0.0469617	0.0483397	0.0325892	0.045814	0.0648046	0.056134	0.0194803	0.00777726	0.0151858	0.0398189	0	0.0167602	0.0194952
fusobacterium	4.0124	12.182	5.19884	4.37152	1.55814	11.1685	4.7437	10.5602	10.1648	5.54133	1.07239	1.04875	7.92425	9.00962	1.16214	11.5944	4.706	0.582247	5.90463	5.16493
phenylobacterium	0	0	0	0	0	0	0	0	0	0	0	0	0	0	0	0	0	0	0	0
amaricoccus	0	0	0	0	0	0	0	0	0	0	0	0	0	0	0	0	0	0	0	0
moraxella	0	0	0	0	0	0	0	0	0.00134277	0	0.00169681	0	0	0	0.00111104	0.00126549	0	0	0	0
brevundimonas	0	0	0	0	0	0	0	0	0	0	0	0	0	0	0	0	0	0	0	0
candidatus phytoplasma	0	0	0	0	0	0	0	0	0	0	0	0	0	0	0	0	0	0	0	0
oscillibacter	0.0239751	0.00297376	0.0102027	0.134697	0.0208796	0.0533545	0.0105208	0.00494334	0.00805661	0.0093112	0.00509044	0.0183613	0.00668262	0.00194803	0.00222207	0.00126549	0.00442432	0.00185429	0.00502807	0
oscillospira	0.0479501	0.0104081	0.0306081	0.679606	0.0900431	0.140211	0.0853352	0.0642634	0.0805661	0.112898	0.0254522	0.0399628	0.0200478	0.0282464	0.029998	0.0151858	0.0958603	0.0222515	0.0184363	0.0376907
odoribacter	0.00856252	0.0133819	0.0272072	5.46593	0.493279	0.0781706	0.0292244	0.0197733	0.0187988	0.034917	0.0237554	0.0108008	0.0147018	0.0136362	0.0133324	0.0113894	0.0117982	0.0111257	0.0184363	0.0116971
prevotella	9.6688	0.148688	22.6987	0.23878	13.526	4.97066	9.46286	1.12461	6.66147	9.97114	10.2912	13.0722	10.4944	0.865898	4.23083	2.95997	5.66166	0.144635	0.358669	24.8733
faecalibacterium	6.08282	2.42659	4.81907	0.283169	2.84092	3.32907	2.18715	4.8593	4.02159	3.92351	4.70357	7.82084	1.38196	1.49511	1.70433	1.94126	2.47467	0.0760259	5.30127	5.63801
mucispirillum	0.0188376	0	0.0566816	0.0872467	0.0965679	0.0632809	0.0140277	0.0457259	0.0228271	0.0128029	0.00339363	0.00756054	0.028067	0.00487007	0.00555519	0.00379646	0.0058991	0.00741716	0.00335205	0.00129968
sporanaerobacter	0.0445251	0.00148688	0.021539	0.0183677	0.00652486	0.0173712	0.0432521	0.00247167	0.0187988	0.0139668	0.0509044	0.0853261	0.00801914	0.00194803	0.0455525	0.0202478	0.0265459	0.00556287	0.00167602	0.0064984
fusicatenibacter	0.00342501	0	0.0113363	0.00765322	0.00260994	0.0012408	0.0222105	0.00123583	0.00671384	0.0023278	0.00169681	0.00432031	0.00133652	0.00194803	0.00444415	0.00126549	0.00442432	0	0.00167602	0
allisonella	0	0.00148688	0.0102027	0.00153064	0.00130497	0.0012408	0.00233795	0	0	0.0058195	0.0186649	0	0.00801914	0	0	0.00632743	0	0	0	0.00389904
dongia	0	0	0	0.0321435	0.00521989	0	0	0.00123583	0.00134277	0	0	0	0.00133652	0	0	0	0.00147477	0	0	0
phaeobacter	0	0	0	0	0	0	0	0	0	0	0	0	0	0	0	0	0	0	0	0
lachnoclostridium	0.148988	0.101108	0.089557	1.76177	0.404541	0.150137	0.157812	0.0902159	0.092651	0.14316	0.218889	0.219256	0.0815279	0.149998	0.13888	0.113894	0.219741	0.118675	0.157546	0.118271
pasteurella	0	0	0	0.00612257	0	0	0	0	0	0	0	0	0	0	0	0	0	0	0	0
cellvibrio	0	0	0	0	0	0	0	0	0	0	0	0	0	0	0	0	0	0	0	0
adiantum	0	0	0	0	0	0	0	0	0	0	0	0	0	0	0	0	0	0	0	0
flavitalea	0	0	0	0	0	0	0	0	0	0	0	0	0	0	0	0	0	0	0	0
actinomyces	0	0.00297376	0.0034009	0.00153064	0.00130497	0.0012408	0	0.00123583	0	0.0011639	0	0.00540038	0	0	0.00111104	0.00126549	0.00442432	0.00370858	0	0
mitsuaria	0	0	0	0	0	0	0	0	0	0	0	0	0	0	0	0	0	0	0	0
barnesiella	0.121588	0.0133819	0.0498798	0.826547	0.283179	0.111672	0.116898	0.022245	0.0671384	0.100095	0.339363	0.0885663	0.0160383	0.0146102	0.187765	0.0645398	0.0265459	0.00185429	0.0217883	0.0506875
peptoclostridium	6.32599	8.20459	5.94704	2.98475	3.28853	6.47327	9.22438	6.29534	7.68466	8.06117	13.9427	16.7369	7.01407	13.0781	11.7814	13.0877	11.7333	0.799199	11.0735	6.0773
gordonibacter	0.0119875	0	0.00113363	0.00612257	0.00260994	0	0.00116898	0	0	0.0011639	0	0.00108008	0	0.000974013	0.00111104	0.00126549	0.0058991	0	0	0
blautia	7.04524	13.3789	10.2832	17.2764	7.08469	7.49197	14.7852	8.45311	11.3424	14.9945	13.432	12.2092	6.82696	18.4946	12.998	12.2967	18.3683	19.2883	15.7111	8.32445
cyniclomyces	0.0017125	0	0	0	0	0	0.00116898	0	0	0	0	0	0	0	0	0	0	0.1947	0	0.0103974
adlercreutzia	0.0342501	0.00297376	0.01247	0.108676	0.0495889	0.00992642	0.0175346	0.00988667	0.0214843	0.0256058	0.132351	0.0205215	0.00534609	0.00389605	0.031109	0.0253097	0.0147477	0	0.00502807	0.00909776
propionibacterium	0	0	0	0	0	0	0	0	0	0	0	0	0	0	0	0	0	0	0	0
papillibacter	0	0	0	0.00459193	0.00130497	0.0012408	0	0	0.00134277	0.0023278	0.00169681	0	0	0	0.00111104	0.00126549	0.0058991	0	0	0.00129968
weissella	0.0017125	0.00148688	0.0034009	0	0.00782983	0	0.00233795	0.00123583	0.00134277	0.0034917	0.00848407	0.00540038	0.00534609	0.00389605	0.00222207	0	0.00442432	0.01298	0.0184363	0.0597853
acetitomaculum	0	0	0	0.00459193	0	0	0	0	0	0.0011639	0	0	0	0	0	0.00126549	0	0	0.00167602	0
desulfovibrio	0	0	0	0.11786	0.0117447	0.00248161	0.00116898	0	0	0.0011639	0	0.00108008	0.00400957	0.000974013	0.00333311	0	0.00442432	0.0166886	0.00335205	0
lactococcus	5.94239	0.0446063	0.223326	0.0918386	3.34334	0.0434281	0.362382	0.389288	0.435057	0.366629	1.8122	2.96481	0.539955	0.0652589	1.29658	0.337885	0.0398189	0.0852973	0.0469287	0.036391
eisenbergiella	0.10275	0.0669095	0.139437	0.0596951	0.24925	0.0620401	0.123911	0.420184	0.116821	0.183896	0.128958	0.217095	0.0761818	0.0603888	0.0733284	0.0632743	0.104709	0.0426487	0.407274	0.246939
rhodoplanes	0	0	0	0	0	0	0	0	0	0	0	0	0	0	0	0	0	0	0	0
veillonella	0.0017125	0.00297376	0.00566816	0.00459193	0.00130497	0.0012408	0.188205	0.00494334	0.00134277	0.011639	0.00509044	0.00108008	0.00400957	0.00292204	0.00111104	0.00379646	0.00294955	0.00185429	0.00167602	0.00259936
holdemania	0.00856252	0.00594751	0.00113363	0.0994918	0.0130497	0.00248161	0.0046759	0.00123583	0.00134277	0.0058195	0.00509044	0.00216015	0.00267305	0.00292204	0.00222207	0.00253097	0.00147477	0	0.00838012	0.00389904
staphylococcus	0.0017125	0.00297376	0.0170045	0.00153064	0.0417591	0.00248161	0.0210416	0.00247167	0.0201415	0.0034917	0.0373299	0.0226816	0.0253939	0.00584408	0.139991	0.0177168	0.0103234	0.0111257	0.00335205	0.00259936
bacteroides	9.8743	14.0346	5.02653	26.0607	7.78807	22.3593	10.2963	20.8176	9.66122	11.1571	5.41283	4.96727	7.13169	15.8842	5.62074	7.22213	11.5961	0.203972	15.5468	5.74069
salinicoccus	0	0.00148688	0.00226727	0	0	0	0	0	0.00134277	0	0	0	0	0	0.00111104	0	0	0.00927145	0	0
bacillus	0	0	0.0034009	0.0658177	0.0104398	0	0.00116898	0.00247167	0.00134277	0.0011639	0.00169681	0.00432031	0	0	0.00444415	0	0.00442432	0.0111257	0	0.00129968
syntrophococcus	0	0.00148688	0.0136036	0	0.00391492	0.00620401	0.0163657	0.00123583	0.00805661	0.0069834	0.00169681	0.00324023	0	0.000974013	0.00777726	0.00379646	0.00147477	0.00370858	0.00167602	0
rothia	0.0017125	0	0	0.00153064	0	0.0012408	0	0	0	0	0	0	0	0	0.00222207	0	0	0	0	0
sporacetigenium	0.0274001	0.049067	0.714189	0.0275516	2.84484	0.0992642	0.154305	0.051905	0.241698	0.0547033	0.356331	0.183613	0.175085	0.0428566	1.31547	0.159451	0.0870117	1.16079	0.0469287	0.0662837
anaerostipes	0	0.00148688	0.0034009	0.0122451	0.00521989	0.0012408	0.00350693	0	0	0.0011639	0	0.00216015	0.00133652	0.00194803	0.00222207	0.00253097	0.00294955	0	0	0.00129968
flavonifractor	0.00685002	0.00297376	0.00113363	0.104084	0.0130497	0.00372241	0.00116898	0.00123583	0.00268554	0.0023278	0.00509044	0.00216015	0.00133652	0.00389605	0.00333311	0.00126549	0.00294955	0	0.00167602	0
megamonas	7.14971	8.31314	6.14429	0.128574	1.51246	3.19879	1.82711	7.0974	4.16661	2.71654	2.16004	2.05863	13.6432	2.43698	2.27763	3.97236	0.97925	0.144635	5.5996	4.42671
methanobrevibacter	0	0	0	0.0244903	0	0	0.00116898	0	0	0	0	0.00108008	0	0.000974013	0	0.00126549	0	0	0	0
subdoligranulum	0.119875	0.642331	0.370698	0.991857	0.328853	0.152619	0.556432	0.473325	0.377318	0.192044	0.174772	0.289461	0.298045	0.110064	0.119992	0.149327	0.206468	0.0185429	0.29498	0.384705
candidatus stoquefichus	0	0	0.00113363	0	0	0	0	0	0.00268554	0.0011639	0	0	0	0.000974013	0.00111104	0.00126549	0	0	0.00167602	0
eubacterium	0.0719252	0.102595	0.100893	1.38982	0.343208	0.0980234	0.122742	0.0568484	0.0711667	0.214158	0.15441	0.13393	0.0414322	0.112012	0.115548	0.0582124	0.284631	0.921582	0.13911	0.295027
natronincola	0	0.00297376	0.0510135	0.00153064	0.142242	0.00496321	0.0245485	0	0.0241698	0.0011639	0.0390267	0.0162012	0.00534609	0.00292204	0.0788836	0.0088584	0.00737387	0.00741716	0.00335205	0.00129968
tyzzerella	0.222626	0.0178425	0.0963588	0.544909	0.126582	0.0347425	0.197557	0.04449	0.122192	0.0838008	0.0933247	0.0712851	0.0922201	0.0545447	0.0355532	0.0480885	0.0678396	0.0185429	0.288276	0.174157
novosphingobium	0	0	0	0	0	0	0	0	0	0	0	0	0	0	0	0	0	0	0	0
starria	0	0	0	0	0	0	0	0	0	0	0	0	0	0	0	0	0	0	0	0
brachyspira	0	0	0.0102027	0.102553	0.0339293	0.0111672	0.00116898	0	0.00134277	0.0453921	0	0.00324023	0.00400957	0.00292204	0.00222207	0.00379646	0.00294955	0	0.00502807	0.00259936
allobaculum	5.33103	2.49796	0.564549	0.0979612	0.675975	0.872284	1.45888	1.88588	1.5227	5.35627	1.5441	1.60391	1.72144	2.30939	6.91398	1.94252	2.98052	0.114966	0.812872	1.66099
rummeliibacillus	0	0	0.0034009	0	0.0208796	0	0.00350693	0	0	0	0	0.00216015	0	0.000974013	0.00111104	0.00253097	0	0	0	0
friedmanniella	0	0	0	0	0	0	0	0	0	0	0	0	0	0	0	0	0	0	0	0
rubrivirga	0	0	0	0	0	0	0	0	0	0	0	0	0	0	0	0	0	0	0	0
candidatus arthromitus	0	0	0.0034009	0.00459193	0.00521989	0.00248161	0.0163657	0	0.0308837	0.0023278	0.00848407	0	0.125633	0.0496747	0.00222207	0.00253097	0.00294955	0.01298	0	0.00519872
anaeroplasma	0.0222626	0.413352	0.0181381	0.367354	0.044369	0.13897	0.0303934	0.395467	0.0295409	0.0477199	0.0135745	0.0237617	0.0601435	0.0185063	0.0211097	0.0278407	0.0191721	0.0148343	0.11397	0.0220946
helicobacter	0.00513751	0.00148688	0.0034009	0.0443887	0.0195746	0.0210936	0.00818283	0.0123583	0.00671384	0.0081473	0.0118777	0.0151211	0.00668262	0	0.00111104	0.00253097	0.00147477	0.00185429	0.0318445	0.00129968
ruminiclostridium	0.0376751	0.00297376	0.0260736	0.064287	0.0691635	0.0285385	0.0128587	0.02966	0.0134277	0.0093112	0.0492076	0.0194414	0.0160383	0.0175322	0.00555519	0.0139204	0.0309703	0.00185429	0.0067041	0.0129968
curvibacter	0	0	0	0	0	0	0	0	0	0	0	0	0	0	0	0	0	0	0	0
desulfomicrobium	0.00342501	0.00148688	0	0.0474499	0.0091348	0	0.00116898	0.00247167	0	0	0	0.00216015	0.00133652	0	0.00111104	0	0	0.00370858	0	0
alkaliphilus	0.00342501	0	0.0113363	0	0.0352342	0	0.00350693	0	0.0241698	0.0011639	0.0254522	0.0108008	0.0200478	0	0.0177766	0.0101239	0.00294955	0.00185429	0.00335205	0.00519872
pseudobutyrivibrio	0	0.00148688	0	0.00612257	0	0	0.00233795	0	0	0.0011639	0	0.00216015	0	0.000974013	0	0	0.00442432	0	0.00167602	0
moorella	0	0	0	0.0336742	0.00130497	0	0	0	0	0	0	0	0	0	0.00111104	0	0	0	0	0
rhodocytophaga	0	0	0	0	0	0	0	0	0	0	0	0	0	0	0	0	0	0	0	0
streptococcus	0.691852	0.228979	0.228994	0.0566338	0.498499	0.0558361	0.474604	0.671058	0.487425	0.135012	1.3337	0.785216	10.2498	0.0808431	3.54976	0.575796	0.0722639	10.9014	0.065365	1.25029
ornithinibacillus	0	0	0	0	0.00260994	0	0.00116898	0	0	0	0	0	0	0	0	0	0	0	0	0
erythrobacter	0	0	0	0	0	0	0	0	0	0	0	0	0	0	0	0	0	0	0	0
selenomonas	0	0.00148688	0.00566816	0	0.00130497	0	0.00233795	0.0037075	0	0.0011639	0.00169681	0.00216015	0	0.00292204	0	0	0	0.00185429	0.00167602	0
gemmiger	0.00513751	0.037172	0.0192718	0.00153064	0.0104398	0.00372241	0.0619557	0.0346034	0.0416258	0.0139668	0.0135745	0.0151211	0.0334131	0.00389605	0.00555519	0.0126549	0.0103234	0	0.0100561	0.0246939
catenibacterium	5.42521	6.99428	10.4158	0.145411	1.56466	2.0436	6.58601	1.18517	3.99742	3.68142	5.36363	5.68768	5.84328	2.19543	4.05084	10.4706	7.18805	0.122383	3.24814	0.785007
prionurus	0.0017125	0	0	0	0.00130497	0.0012408	0.00116898	0.00247167	0	0.0011639	0.00169681	0.00216015	0.00133652	0.000974013	0.00111104	0	0	0.00556287	0.00335205	0.00259936
erysipelatoclostridium	0.181525	1.30251	0.187049	5.73532	0.626387	0.130284	0.447718	0.28177	0.657957	0.611048	0.690603	0.875942	0.455754	0.75486	0.51441	0.683363	0.797853	0.0259601	0.499455	0.411999
oribacterium	0	0	0	0	0	0	0.00116898	0	0	0.0011639	0	0	0	0	0	0	0	0	0	0
shigella	0	0.00148688	0.0102027	0.00306129	0.00260994	0.0012408	0.00116898	0.00247167	0.00268554	0	0.00509044	0.0194414	0.00133652	0.00194803	0.00666622	0.00126549	0.00147477	0.495095	0.00167602	0.00389904
acidovorax	0	0	0	0	0	0	0	0	0	0	0	0	0	0	0	0	0	0	0	0
butyricicoccus	0.231188	0.509999	0.310615	0.156126	0.2362	0.157582	0.746975	0.265704	0.323607	0.289811	0.232463	0.14257	0.180431	0.212335	0.245539	0.326495	0.424735	0.0148343	0.196095	0.158561
slackia	0.190088	0.0520407	0.0487462	0.371946	0.153987	0.075689	0.0502659	0.0828009	0.110107	0.119882	0.61764	0.122049	0.0387592	0.0496747	0.127769	0.177168	0.0988099	0.00556287	0.0586609	0.0831795
sedimentibacter	0	0.00148688	0	0.00153064	0.00130497	0	0.00116898	0	0	0	0	0.00108008	0	0.000974013	0	0	0	0	0	0
clostridium	6.45272	14.0019	6.03773	6.37819	13.0876	12.5941	8.83044	10.8889	12.6449	7.87029	11.7861	7.93532	9.79003	17.353	14.4401	16.5728	12.3822	39.5705	14.9602	13.7337
lactobacillus	0.356201	0.00892127	0.068018	0.068879	0.670756	0.00620401	0.230288	0.0160658	0.0295409	0.0279336	0.281671	0.129609	0.0507879	0.0116882	0.0544408	0.0518849	0.00442432	0.01298	0.0134082	0.0246939
sutterella	1.59777	0.620028	1.32522	1.12655	2.77176	2.41708	1.3151	1.98104	0.854001	0.548197	0.424203	0.429871	1.17748	0.585382	0.187765	0.436593	0.36132	0.189138	0.0452527	1.04104
parasutterella	0.274001	0.240874	0.293611	0.645932	0.754274	0.301515	0.280554	0.757566	0.179931	0.368956	0.0559948	0.14473	0.354179	0.129544	0.0444415	0.0544159	0.0766882	0.0649001	0.362021	0.174157
coprobacillus	0.0959003	0.101108	0.0532807	0.11786	0.120057	0.134007	0.135601	0.0679709	0.234984	0.093112	0.128958	0.13501	0.0427687	0.420774	0.104437	0.320168	0.233014	0.00556287	0.276544	0.209249
brochothrix	0	0	0	0	0	0	0	0	0	0	0	0	0	0	0	0	0	0	0	0
lutispora	0	0	0	0.00153064	0.00130497	0	0	0	0	0	0	0	0	0.000974013	0	0	0	0	0	0
gemella	0.0017125	0	0	0	0.00130497	0.00248161	0	0	0	0	0	0.00108008	0	0	0	0	0	0	0	0
campylobacter	0.0017125	0	0.00113363	0	0	0.0012408	0	0.00123583	0	0	0.00169681	0	0	0	0	0	0	0	0.0201123	0
gracilibacter	0	0	0	0.00306129	0	0	0	0	0	0.0011639	0	0	0	0	0	0	0	0	0	0
succinivibrio	0.00685002	0.00594751	0.0918242	0	0.0104398	0.0322609	0.0292244	0.0123583	0.0120849	0.0360809	0.680422	0.0777655	0.00801914	0.00194803	0.0533298	0.106301	0	0	0.0100561	0.0103974
alloprevotella	1.77929	0.0802914	1.88296	0.160718	1.13141	5.0116	3.9827	10.2537	5.07835	3.79082	0.108596	0.505476	3.41883	3.6993	3.302	1.84128	3.08523	0.0815888	1.95257	3.13873
dorea	0.0736377	0.0669095	0.0634834	0.133166	0.129192	0.0794114	0.137939	0.0543767	0.0657957	0.0663423	0.23416	0.111248	0.0481148	0.0779211	0.113326	0.105035	0.126831	0.215098	0.0888293	0.0662837
anaerobiospirillum	1.73819	0.785072	0.451186	0.064287	0.284484	2.37241	0.144953	2.64469	0.279296	0.516772	0.403842	0.158771	0.656233	0.190907	0.0188876	0.096177	0.0516171	0.0500658	1.96598	0.939669
macrococcus	0	0	0.00113363	0	0	0	0	0	0	0	0	0	0	0	0	0	0	0.00185429	0	0.00129968
lautropia	0	0	0	0	0	0	0	0	0	0.0011639	0	0	0	0	0.00333311	0	0	0.00370858	0	0
corynebacterium	0.00342501	0	0	0.00306129	0.00260994	0.00744482	0.00233795	0.00123583	0	0.0011639	0	0.0129609	0.00133652	0.000974013	0.0433304	0.00126549	0	0	0	0
pseudomonas	0	0	0.00113363	0	0.00130497	0	0.00116898	0	0	0	0	0	0	0.00194803	0.00111104	0	0	0	0	0
hespellia	0.0017125	0.00148688	0.00113363	0.0153064	0.00260994	0.0012408	0.00116898	0.00123583	0.00134277	0	0	0.00108008	0.00267305	0.000974013	0	0.00253097	0	0	0	0.00129968
saccharibacter	0	0	0	0	0	0	0	0	0	0	0	0	0	0	0	0	0	0	0	0
howardella	0.0222626	0.0208163	0.0068018	0.00918386	0.0130497	0.0260569	0.047928	0.0123583	0.0268554	0.0279336	0.0865375	0.0270019	0.0120287	0.0175322	0.0111104	0.0164513	0.0265459	0.0111257	0.00502807	0.0233942
kluyvera	0	0	0	0	0	0	0	0	0	0	0	0	0	0	0	0	0	0.101986	0	0
christensenella	0	0.00148688	0	0.0153064	0.00260994	0	0.00116898	0	0	0.0011639	0	0	0.00133652	0.00194803	0.00111104	0	0	0	0	0
altererythrobacter	0	0	0	0	0	0	0	0	0	0	0	0	0	0	0	0	0	0	0	0
flexispira	0.0017125	0	0.00226727	0.00918386	0	0.00372241	0.00584488	0.00617917	0.00134277	0.0058195	0	0.00432031	0.00267305	0	0	0.00126549	0	0.00185429	0.0100561	0
parvimonas	0	0	0.00113363	0.00306129	0	0	0	0	0	0	0	0	0	0	0	0	0	0	0	0
brachymonas	0	0	0.00113363	0.00306129	0	0	0	0	0	0	0	0	0	0.000974013	0	0	0	0	0	0
dehalobacterium	0	0	0	0.00153064	0	0	0	0	0	0.0011639	0	0	0	0.000974013	0	0	0	0	0	0
anaerovibrio	0	0	0.00226727	0.00153064	0.00260994	0.00372241	0.00350693	0.00247167	0.00671384	0.0162946	0.00169681	0.00108008	0.00267305	0.00389605	0.0488856	0	0.00147477	0	0	0.00259936
roseburia	0.00856252	0.00743439	0.0113363	0.33368	0.0561138	0.0173712	0.0233795	0.0308959	0.00671384	0.0221141	0.0169681	0.0183613	0.00935566	0.0126622	0.0144435	0.0113894	0.0235964	0.00741716	0.0201123	0.00779808
denitrobacterium	0	0	0	0	0	0	0	0.00123583	0	0.0023278	0	0	0	0	0	0.00126549	0.00147477	0	0	0
pseudoflavonifractor	0.0393876	0.00446063	0.0238063	0.756138	0.0900431	0.0335017	0.0268864	0.00247167	0.00537107	0.0128029	0.00848407	0.0162012	0.00534609	0.0136362	0.0155545	0.00632743	0.0058991	0.00370858	0.00167602	0.0064984
gottschalkia	0	0	0	0	0.00521989	0	0	0	0	0.0011639	0	0	0	0	0	0	0	0	0	0.00129968
skermanella	0	0	0	0	0	0	0	0	0	0	0	0	0	0	0	0	0	0	0	0
burkholderia	0	0	0	0	0	0	0	0	0	0	0	0	0	0	0	0	0	0	0	0
collinsella	1.04292	0.791019	0.357094	1.40054	1.73561	0.513692	0.461745	0.619153	0.851315	1.09407	3.72111	1.49159	0.947595	0.591226	1.58767	1.36293	1.11935	0.0426487	0.734099	0.457487
anaerorhabdus	0.0222626	0.0193294	0.0113363	0.0474499	0.0352342	0.0148896	0.0444211	0.0333675	0.0161132	0.0453921	0.0254522	0.0291621	0.0334131	0.0457786	0.0266649	0.0366991	0.0560414	0.00741716	0.0184363	0.0220946
phascolarctobacterium	1.40083	0.318192	1.45218	1.63014	1.71604	1.97164	1.11637	1.63501	1.30786	1.36875	0.911189	0.830579	0.633512	1.06557	0.395529	0.461903	1.4674	0.0537744	0.613425	1.76886
anaerovorax	0.428126	0.0178425	0.034009	0.61838	0.172256	0.119117	0.0619557	0.0111225	0.139648	0.399218	0.325788	0.479554	0.0601435	0.0779211	0.301091	0.0683363	0.224166	0.0222515	0.00502807	0.0545866
sarcina	0.00513751	0.00594751	0.0136036	0.0811241	1.74866	0.0148896	0.0046759	0.0111225	0.00805661	0.0093112	0.00509044	0.00972069	0.0133652	0.00779211	0.0566629	0.00632743	0.0176973	0.292978	0.0385486	0.028593
rikenella	0.0017125	0.00297376	0.00566816	0.864814	0.0900431	0.00992642	0.0046759	0.00123583	0.00537107	0.011639	0.0152713	0.00324023	0.00534609	0.00292204	0.00666622	0	0.00442432	0	0.00167602	0.00389904
spirochaeta	0	0	0.00113363	0.064287	0.00521989	0.00248161	0	0	0	0.0011639	0.00169681	0	0	0.00194803	0	0.00253097	0.00147477	0.00185429	0.00335205	0
stenotrophomonas	0	0	0	0	0	0	0	0	0	0	0	0	0	0	0	0	0	0	0	0
ethanoligenens	0	0	0	0.00153064	0	0	0	0	0	0	0.00169681	0.00108008	0	0	0	0	0	0	0	0
paraprevotella	10.138	3.13137	3.64236	0.463785	3.59259	6.72515	7.66263	2.42841	4.94139	6.80067	3.26637	1.99598	3.0152	2.21491	6.23625	2.57906	2.6251	0.057483	3.07048	3.89254
bradyrhizobium	0	0	0	0	0	0	0	0	0	0	0	0	0	0	0	0	0	0	0	0
nocardioides	0	0	0	0	0	0	0	0	0	0.0011639	0	0	0	0	0	0	0	0	0	0
dietzia	0	0	0	0	0.00130497	0	0.00233795	0	0	0	0	0.00216015	0	0	0.00444415	0	0.00147477	0.00370858	0.00167602	0
globicatella	0	0	0	0	0	0.0012408	0	0.00123583	0	0	0	0.00216015	0	0.000974013	0	0.00126549	0.00147477	0	0	0
lactonifactor	0	0.00148688	0	0.00765322	0	0	0.00116898	0	0	0	0.00169681	0.00108008	0	0.000974013	0.00111104	0	0	0	0	0
candidatus soleaferrea	0.0017125	0.00148688	0.0102027	0.113268	0.0300144	0.00496321	0.00584488	0.00123583	0.00537107	0.0104751	0.00678725	0.0118808	0.00668262	0.00389605	0.00555519	0	0.00147477	0.00185429	0.00335205	0.0064984
faecalitalea	0.0137	0.282507	0.0136036	0.0566338	0.0195746	0.0111672	0.0175346	0.0111225	0.0120849	0.0221141	0.0254522	0.0270019	0.0400957	0.00487007	0.0511077	0.0126549	0.0103234	0.176158	0.129054	0.0194952
holdemanella	2.50197	4.27329	1.77187	0.0734709	1.91439	0.392094	1.7558	0.633983	1.75768	3.71284	2.35687	4.95215	1.43275	1.2818	2.42317	1.65526	3.69726	0.0778802	2.84421	2.35372
desulfitobacterium	0	0	0.00113363	0.00612257	0.00260994	0	0	0	0	0	0	0	0.00133652	0	0	0	0	0	0	0
parvibacter	0	0	0	0.00918386	0.00260994	0	0	0	0.00134277	0	0.00509044	0	0.00133652	0	0	0	0	0	0	0
sporobacter	0.332226	0.0193294	0.0668843	1.00869	0.195746	0.13897	0.226781	0.0580842	0.229613	0.672734	0.0390267	0.0583242	0.0267305	0.0564928	0.159989	0.046823	0.137154	0.0259601	0.0335205	0.028593
turicibacter	0.0839127	0.312244	5.5514	0.273985	15.7484	0.599308	3.95231	0.112461	5.31334	0.174585	5.01239	3.59126	0.954278	0.638953	5.93072	2.27155	0.371643	0.163178	0.335205	0.379507
anaerotruncus	0	0	0.0034009	0.0581645	0.00782983	0.00868562	0	0.00247167	0	0.0023278	0	0.00324023	0.00133652	0	0	0.00126549	0	0	0	0.00129968
natranaerovirga	0	0	0	0	0	0	0	0	0.00134277	0	0	0.00216015	0	0.000974013	0.00222207	0	0.00147477	0	0	0
massilia	0	0	0	0	0	0	0	0	0	0	0	0	0	0	0	0	0	0	0	0
